# Supplementary material for: Size‐Controlled Synthesis of CoFe2O4 Nanoparticles Potential Contrast Agent for MRI and Investigation on Their Size‐Dependent Magnetic Properties
Source: Hindawi journal article supplement (doi:10.1155/2013/462540), 2013-01-01
Supplement: f1 [file 462540.f1.docx]

Size-controlled synthesis of CoFe2O4 nanoparticles potential contrast agent for MRI and investigation on their size-dependent magnetic properties

Fujun Liua, Sophie Laurenta, Alain Rocha, Luce Vander Elsta, Robert N. Mullera, b, *

a Department of General, Organic and Biomedical Chemistry, NMR and Molecular Imaging Laboratory, University of Mons, B-7000 Mons, Belgium

b Center for Microscopy and Molecular Imaging (CMMI), Académie Wallonie - Bruxelles, B-6041 Charleroi-Gosselies, Belgium

Supporting Information

Contents:

1. Section on measurements of Fe and Co concentrations – page S2-S5

2. Fig. S3 – page S6

3. Fig. S4 – page S7

4. Fig. S5 – page S8

5. Fig. S6 – page S8

6. Fig. S7 – page S9

***Measurement of Fe concentration:*** As there were peak-overlaps between Fe and Co absorption for inductively coupled plasma (ICP) measurements, the concentration of Fe was confirmed by spectrophotography, using 1,10-phenanthrolin as the chromogenic agent. The principle is that, Fe3+ ions were reduced to Fe2+, and the formed Fe2+ ions reacted with 1,10-phenanthrolin into pink complex. Here CoFe2O4 NPs with hydrodynamic diameters of 12.98, 15.97, 19.25 28.35nm and 32.85nm were tested, denoted as SP1, SP2, SP3 SP4 and SP5, respectively.

(1) Fe absorption curve

Standard Fe solution (1000mg/L), 1mL 1% hydroxylamine hydrochloride, 2mL HAc-NaAc buffer and 2mL 0.1% 1,10-phenanthroline were mixed to prepare 10mL Fe solution of 1mg/L, 2mg/L, 5mg/L and 10mg/L. Using UV-vis at 510nm, the Fe standard absorption curve has been obtained as shown in Fig. S1, and the equation is Abs=0.08995+0.19934*x*, where x is the concentration of Fe3+ in mg/L.

**Fig. S1.** The standard adsorption curve of Fe**.**

(2) Concentration of Fe in Samples

1mL sample, 0.3mL H2O2 and 0.6mL HNO3 were mixed and treated by microwaves for 25 min, and subsequently diluted into 10mL. Then 1mL of the obtained solution was treated via the same process as in (1) into 10mL and its UV-Vis absorption was recorded. The Fe concentrations were calculated as shown in Table S1.

**Table S1.** Calculation of Fe concentrations.

| Sample | SP1 | SP2 | SP3 | SP4 | SP5 |
| --- | --- | --- | --- | --- | --- |
| Abs | 0.3844 | 0.9806 | 1.3390 | 1.5472 | 1.5839 |
| [FeUV] (mg/L): (AbS0.08995)/0.19934 | 1.4772 | 4.4678 | 6.2660 | 7.3104 | 7.4945 |
| [FeSP] (mg/L): 100∙[FeUV] | 147.72 | 446.78 | 626.60 | 731.04 | 749.45 |
| [FeSP] (mM): [FeSP] /55.847 | 2.65 | 8.01 | 11.22 | 13.09 | 13.42 |

***Measurement of Co concentration:*** There is no special chromogenic agent specific for Co3+ or Co2+ ions, so the concentration of Co was obtained through external standard method by measuring the *R1* values.

(1) Standard Co relaxation by proton relaxometry

A standard Co solution was mixed with 0.3 mL H2O2 and 0.6 mL HNO3 into 10 mL in total, followed by microwave treatment to prepare a Co solution with different concentrations to get the relaxation constant of Co via T1 measurements. The results are shown in Fig. S2, and are fitted with the equation of R1`Co=1.833[Co]+0.2861, where R1`Co and [Co] are the relaxation rate and concentration of Co ions, in S-1 and mM, respectively.

**Fig. S2.** The R1 measurements of standard Co solutions and the fitting curve.

(2) Measurement of Co concentration by proton relaxometry

0.2mL sample was microwave treated with 0.3 mL H2O2 and 0.6 mL HNO3, and diluted into 10 mL in total before measurement of T1 at 20 MHz. Based on the equation of R1=11.4207[Fe]+0.2861, which is the relaxation rate of Fe3+ solution and obtained with the same method as described above, concentrations of Co in samples were obtained by calculation. The results are shown in Table S2.

**Table S2**. Calculation of Co concentrations

| Sample | SP1 | SP2 | SP3 | SP4 | SP5 |
| --- | --- | --- | --- | --- | --- |
| T1 /ms | 1060.3 | 441.4 | 327.4 | 284.2 | 277.4 |
| R1 /S-1: 1000÷T1 | 0.9431 | 2.2653 | 3.0539 | 3.5191 | 3.6049 |
| [Fe]T1 /mM | 0.0529 | 0.1600 | 0.2244 | 0.2618 | 0.2684 |
| R1Fe /S-1: 11.4207×[Fe]T1 | 0.6041 | 1.8273 | 2.5628 | 2.9899 | 3.0653 |
| R1 Co /S-1: R1-0.2861- R1 Fe | 0.0529 | 0.1519 | 0.2050 | 0.2431 | 0.2535 |
| [Co]T1 /mM: R1Co÷1.833 | 0.0289 | 0.0829 | 0.1118 | 0.1326 | 0.1383 |
| [Fe]/[Co] | 1.8304 | 1.9394 | 1.9016 | 1.9744 | 1.9415 |
| [Co]SP /mM: 50×[Co]T1 | 1.445 | 4.145 | 5.59 | 6.63 | 6.915 |

**
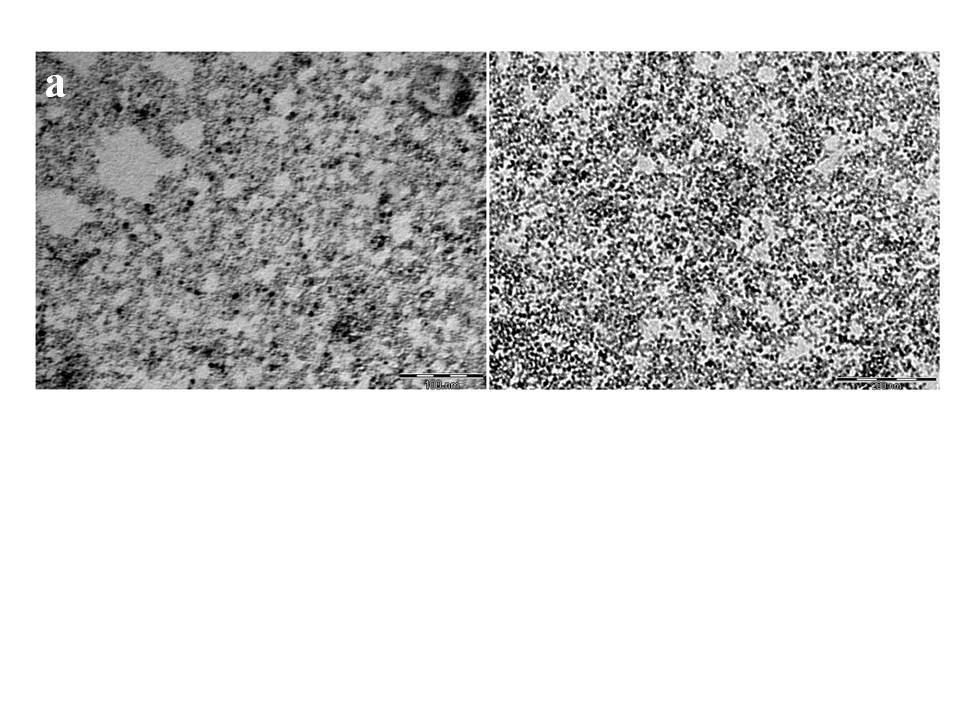

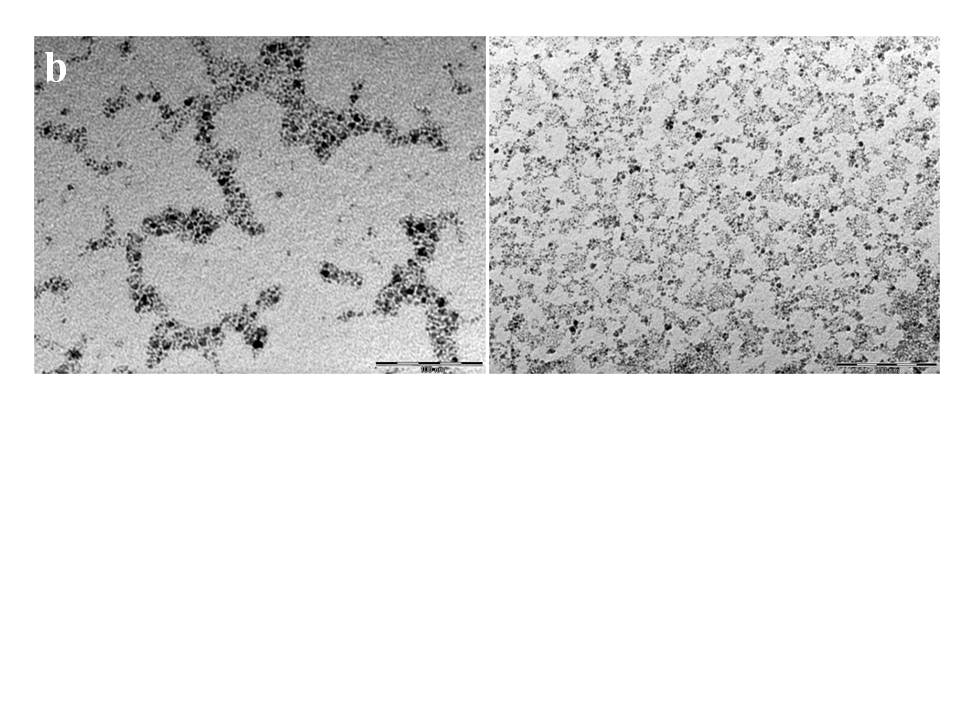

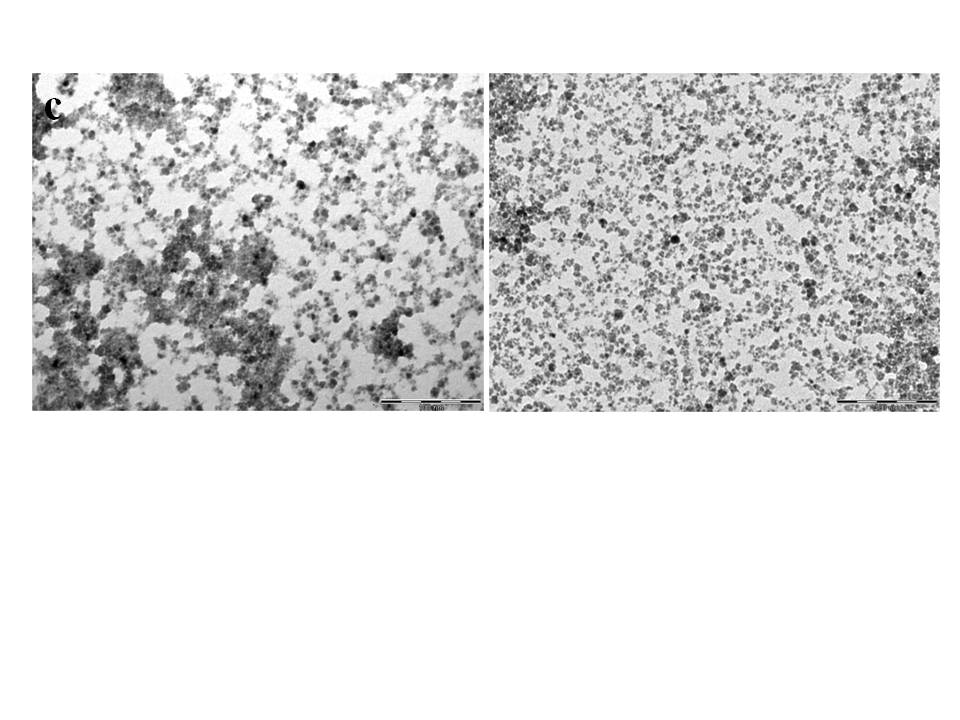

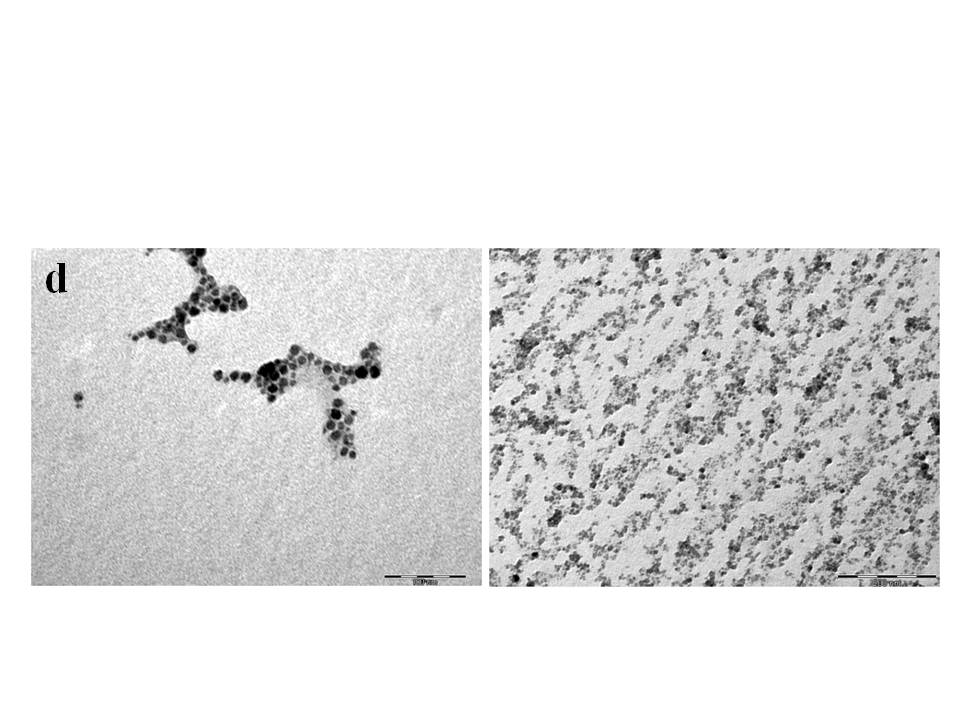
**

**Fig. S3.** TEM pictures of obtained CoFe2O4/H+/citrate NPs with diameters by PCS being a) 12.98, b) 15.97 nm, c) 19.25nm and d) 37.89nm, where the scale bars for left pictures and right ones are 100nm and 200nm, respectively, the diameters and PDIs for S3-a, S3-b, S3-c and S3-d are 7.25nm and 1.1154, 8.51nm and 1.0941, 9.26nm and 1.0536, 11.02nm and 1.1735, respectively.


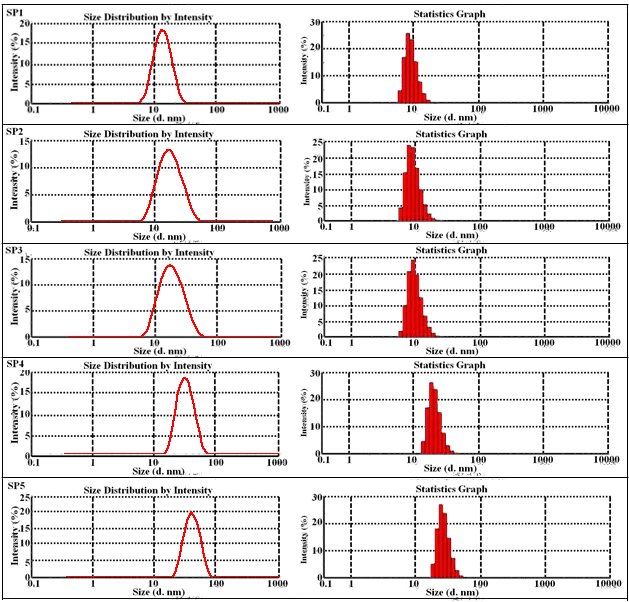


**Fig. S4.** Size distributions by intensity and statistics graphs of CoFe2O4/H+/citrate NPs by photon correlation spectroscopy (PCS).


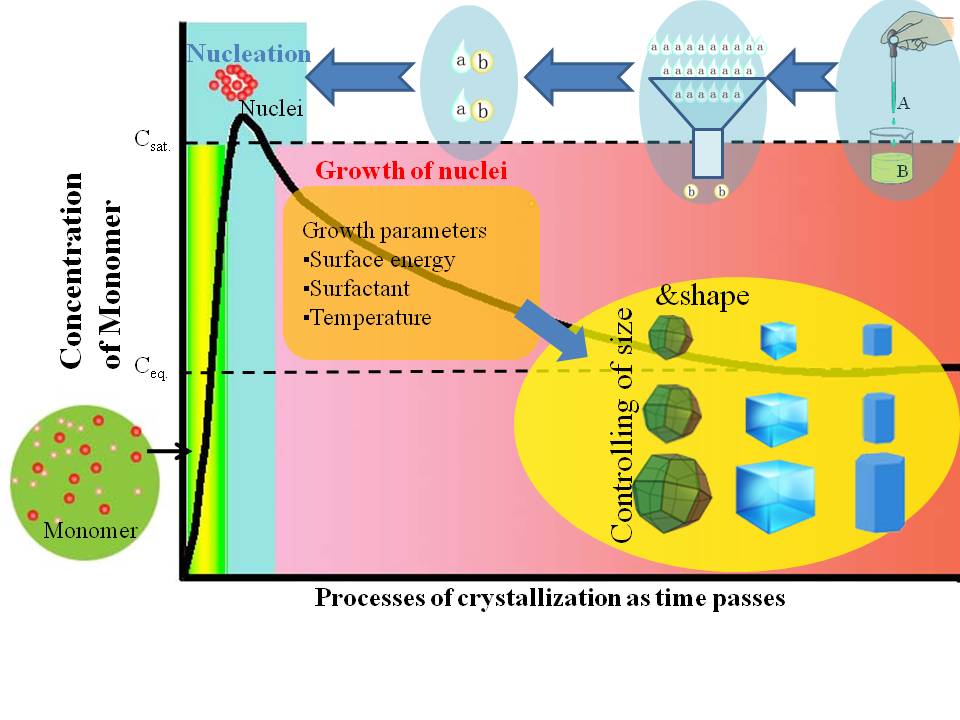


**Fig. S5**.Nanocrystal formation: nucleation and growth processes, where *csat.* and*ceq.*are the saturation concentration of monomers and the equilibrium concentration between monomers and formed crystal, respectively.


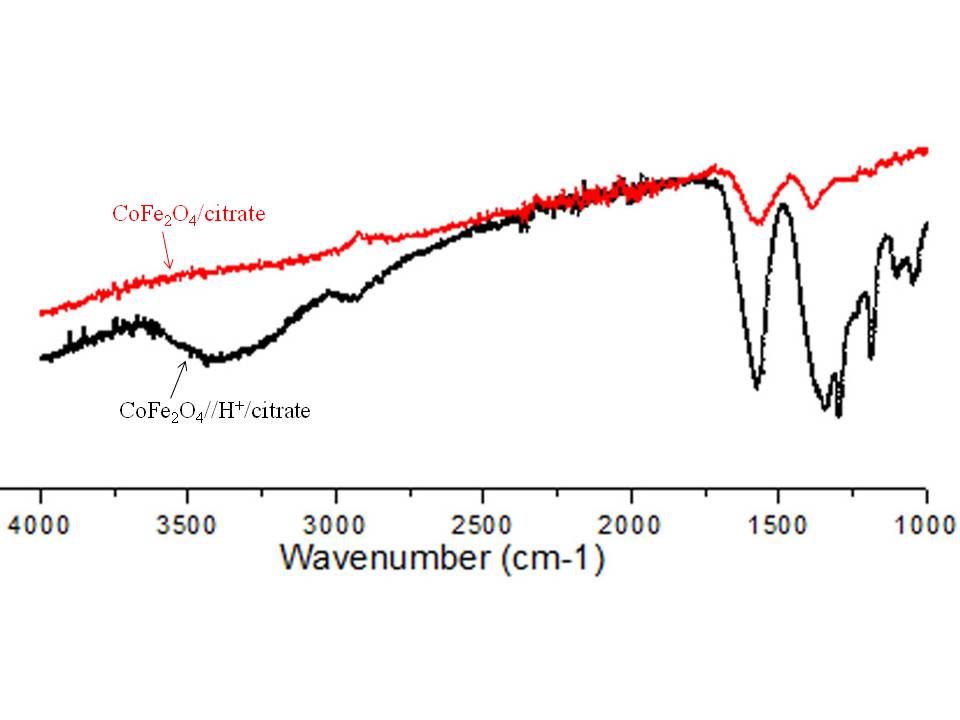


**Fig. S6**.Comparison of the IR spectra acquired from CoFe2O4/citrate NPs and CoFe2O4/H+/citrate NPs.


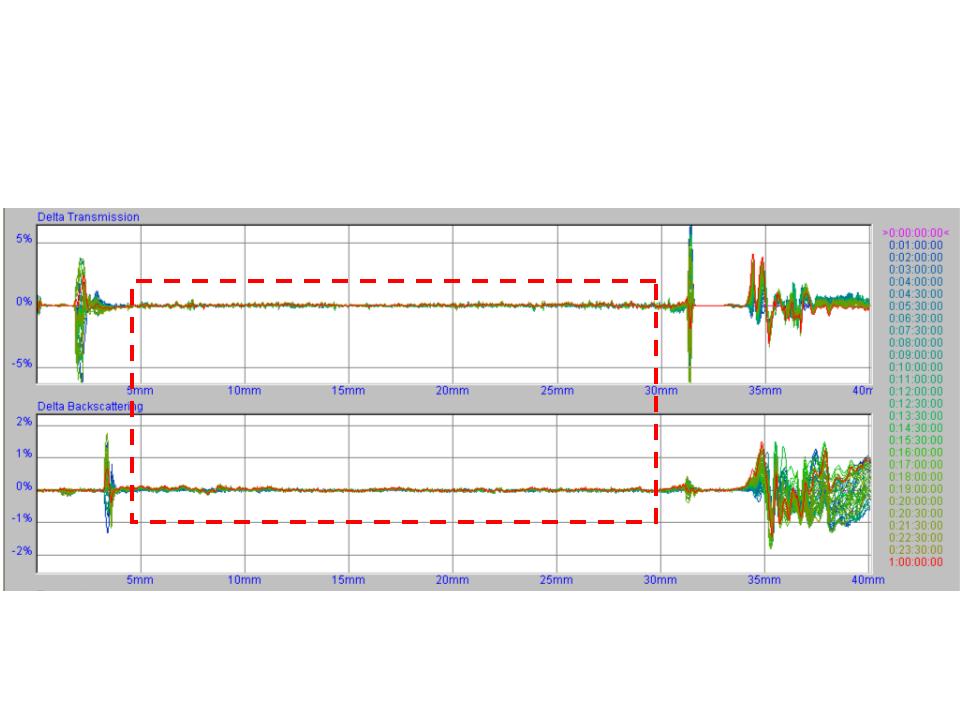


**Fig. S7**.Transmission and backscattering proﬁles of CoFe2O4/H+/citrate with DPCS of 37.89nm colloid by using Turbiscan Lab® Expert. The curves between 4 and 30mm (inside the red dashed border) are the transmission/backscattering for different parts of measured colloid.
